# Supplementary material for: Enhanced thermal shock resistance of ultra-high temperature ceramic by biomimetic surface modification
Source: Royal Society of Chemistry journal article supplement (doi:10.1039/c4ta05589f), 2014-12-03
Supplement: c4ta05589f1.pdf [file c4ta05589f1.pdf]

## Supporting information

### Enhanced thermal shock resistance of ultra-high temperature ceramic by biomimetic surface modification

*Baoxi Zhang,<sup>a</sup> Xinghong Zhang,<sup>a</sup> Yunfeng Qiu,<sup>a</sup> Jiecai Han,<sup>\*a</sup> PingAn Hu,<sup>\*b</sup> Changqing Hong,<sup>\*a</sup> Zujun Peng,<sup>a</sup> Wenbo Han,<sup>a</sup> Guiqing Chen,<sup>a</sup> Ping Hu<sup>a</sup>*

<sup>a</sup> Science and Technology on Advanced Composites in Special Environments Laboratory, Harbin Institute of Technology, Harbin, Heilongjiang, 150080, P. R. China

<sup>b</sup> Key Lab of Microsystem and Microstructure, Harbin Institute of Technology, Ministry of Education, No. 2 YiKuang Street, Harbin, 150080, P. R. China

\*Corresponding author e-mail: hanjc@hit.edu.cn (J. C. Han), hupa@hit.edu.cn (P. A. Hu) and hongcq@hit.edu.cn (C. H. Hong)

#### Table of Contents

**Fig. S1** Mapping images of elements distribution.

**Fig. S2** Typical top SEM images of YSZ coating.

**Fig. S3** TEM images of YSZ powders.

**Fig. S4** TG and DSC curves of YSZ gel.

**Fig. S5** Digital camera images of hydrophobic properties.

**Fig. S6** Typical optical images of prepared samples.

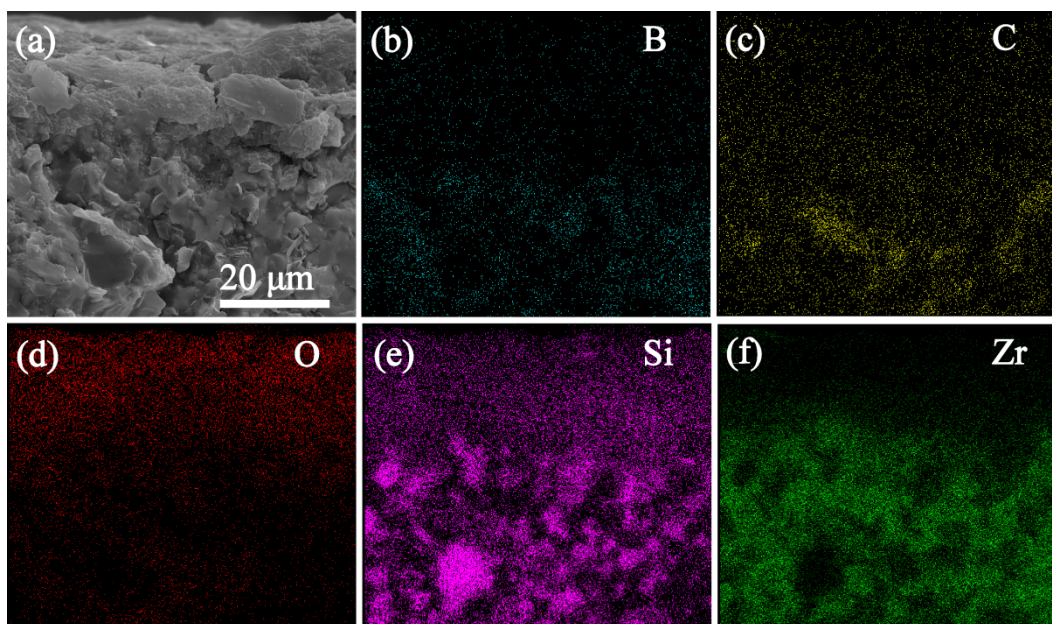

**Fig. S1** Mapping images of elements distribution. (a) A cross-sectional SEM image of specimen with coating. (b-f) The mapping images of B, C, O, Si and Zr elements for specimen with YSZ coating, respectively.

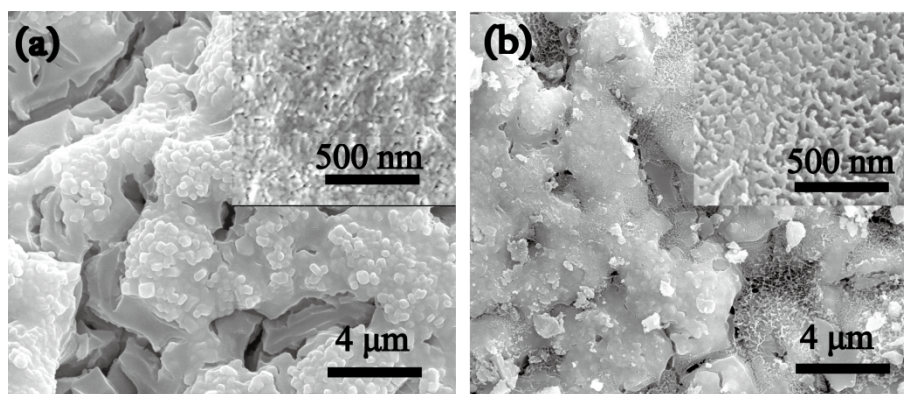

**Fig. S2** Typical top SEM images of the first (a) and second (b) round dip-coating and calcination at 600 °C, respectively.

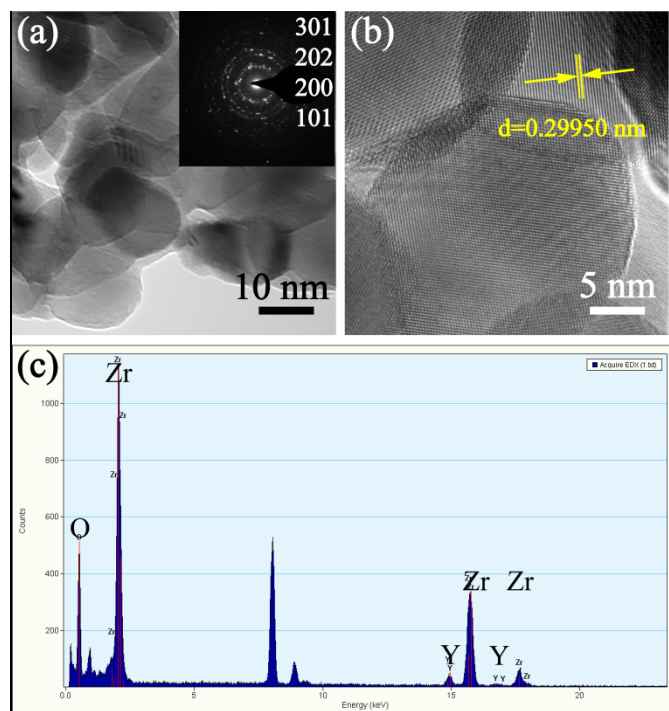

**Fig. S3** TEM images of YSZ powders. (a) The typical conventional TEM bright fields of the YSZ powders and the SAED pattern (the inset). (b) A HR-TEM image taken from the same area. (c) Energy-dispersive analysis microscope (EDAM) of YSZ coating.

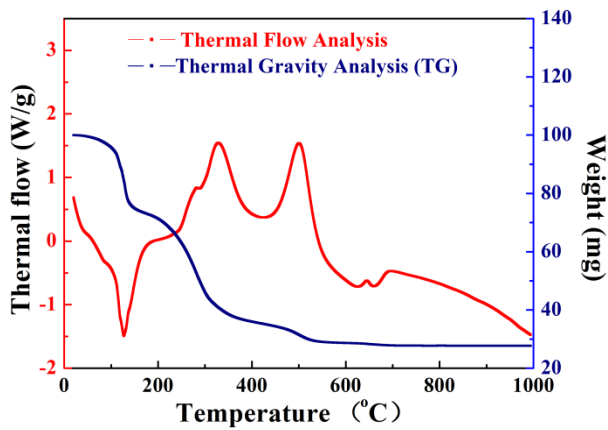

**Fig. S4** TG and DSC curves of YSZ gel.

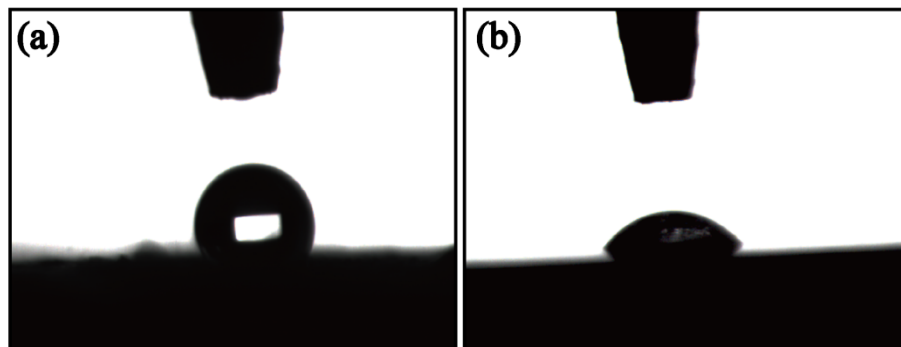

**Fig. S5** The digital camera images of deionized water drops on the samples with (a) and without nanostructures (b), respectively.

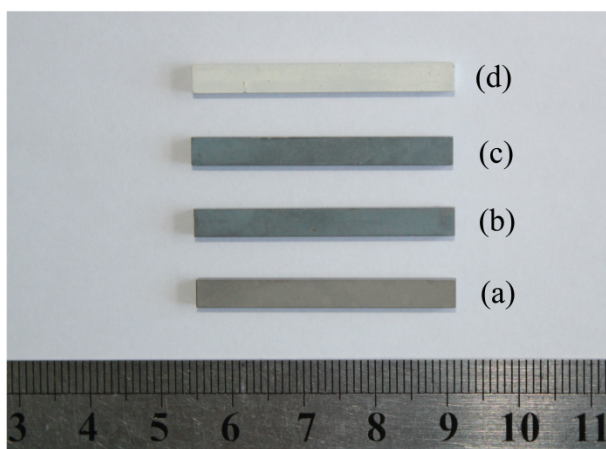

**Fig. S6** The typical optical images of  $\text{ZrB}_2$  ceramic matrix composite (a), oxidation at  $900\text{ }^\circ\text{C}$  for 1 h (b), alkali treatment with concentrated  $\text{NH}_3\cdot\text{H}_2\text{O}$  and  $\text{H}_2\text{O}_2$  at  $90\text{ }^\circ\text{C}$  for 1 h (c), the third dip-coating and calcination at  $600\text{ }^\circ\text{C}$  (d).
